# Supplementary material for: Targeting Myeloid-Derived Suppressor Cells Is a Novel Strategy for Anti-Psoriasis Therapy
Source: Hindawi journal article supplement (doi:10.1155/2020/8567320), 2020-06-28
Supplement: f1 [file 8567320.f1.pdf]

Supplementary data

Supplementary table S1. A list of the primer for qPCR.

| Gene    | Species |         | Primer sequence          |
|---------|---------|---------|--------------------------|
| Il-21   | mice    | Forward | TGGATCCTGAACTTCTATCAGC   |
|         |         | Reverse | CACGAGGTCAATGATGAATGTC   |
| Cd109   | mice    | Forward | TCTCGTTCTTCCGGCACTACCTC  |
|         |         | Reverse | TTCCTGCTTCGGCTTGTAGAATGC |
| Dsp     | mice    | Forward | AGGACCGTGAAGGATCAGGACATC |
|         |         | Reverse | TCCTCCTCCAGCATCTTCCTCTTG |
| Timd2   | mice    | Forward | AATCTCTGAGCTTCGTTGCCTTCC |
|         |         | Reverse | CTGGTCTTCACATCTGGTCCGTTC |
| Ackr2   | mice    | Forward | TCCATCTACGACTACGACTACT   |
|         |         | Reverse | AGGGCATAGTCACTACAAACAA   |
| Adamts9 | mice    | Forward | GAGTACAGCGGATCGGACAATGTG |
|         |         | Reverse | CACGGACAACACCTGAAGGAGAAG |
| Gapdh   | mice    | Forward | AACTTTGGCATTGTGGAAGG     |
|         |         | Reverse | ACACATTGGGGGTAGGAACA     |

**Supplementary table S2. A list of the antibodies for flow cytometry.**

| For mice                           | Source        | For human                     | Source    |
|------------------------------------|---------------|-------------------------------|-----------|
| Zombie Aqua™ Fixable Viability Dye | BioLegend     | APC/Cy7 anti-human CD45       | BioLegend |
| Trustain fcX anti-mouse CD16/32    | BioLegend     | PerCP/Cy 5.5 anti-human CD11b | BioLegend |
| APC/Cy7 anti-mouse CD45            | BioLegend     | APC anti-human CD33           | BioLegend |
| PE/Cy7 anti-mouse/human CD11b      | BioLegend     | BV510 anti-human HLA-DR       | BioLegend |
| PerCP/Cy 5.5 anti-mouse Gr-1       | BioLegend     |                               |           |
| PE Rat anti-mouse IL-17A           | BD Pharmingen |                               |           |
| APC anti-mouse IFN-r               | BioLegend     |                               |           |
| FITC anti-mouse CD4                | BioLegend     |                               |           |
| Anti-mouse CD25 APC                | eBioscience   |                               |           |
| Anti-mouse/rat Foxp3 PE            | eBioscience   |                               |           |
